# Supplementary material for: The Kinetic Energy of PAH Dication and Trication Dissociation Determined by Recoil-Frame Covariance Map Imaging
Source: Royal Society of Chemistry journal article supplement (doi:10.1039/d2cp02252d), 2022-06-17
Supplement: d2cp02252d2.pdf [file d2cp02252d2.pdf]

- File name: movie\_0.mp4
  - $C_{13}H_{10}^{3+} \rightarrow C_7H_6^+ + C_6H_4^{2+}$  (KER = 3.6 eV)
- File name: movie\_1.mp4
  - $C_{13}T_{10}^{3+} \rightarrow C_{11}T_8^{2+} + C_2T_2^+$  (KER = 2.1 eV)
- File name: movie\_2.mp4
  - $C_{13}T_{10}^{3+} \rightarrow C_7T_6^{2+} + C_6T_4^+$  (KER = 3.1 eV)
